# Supplementary material
Source: PubMed Central journal article supplement (PMC3371233)

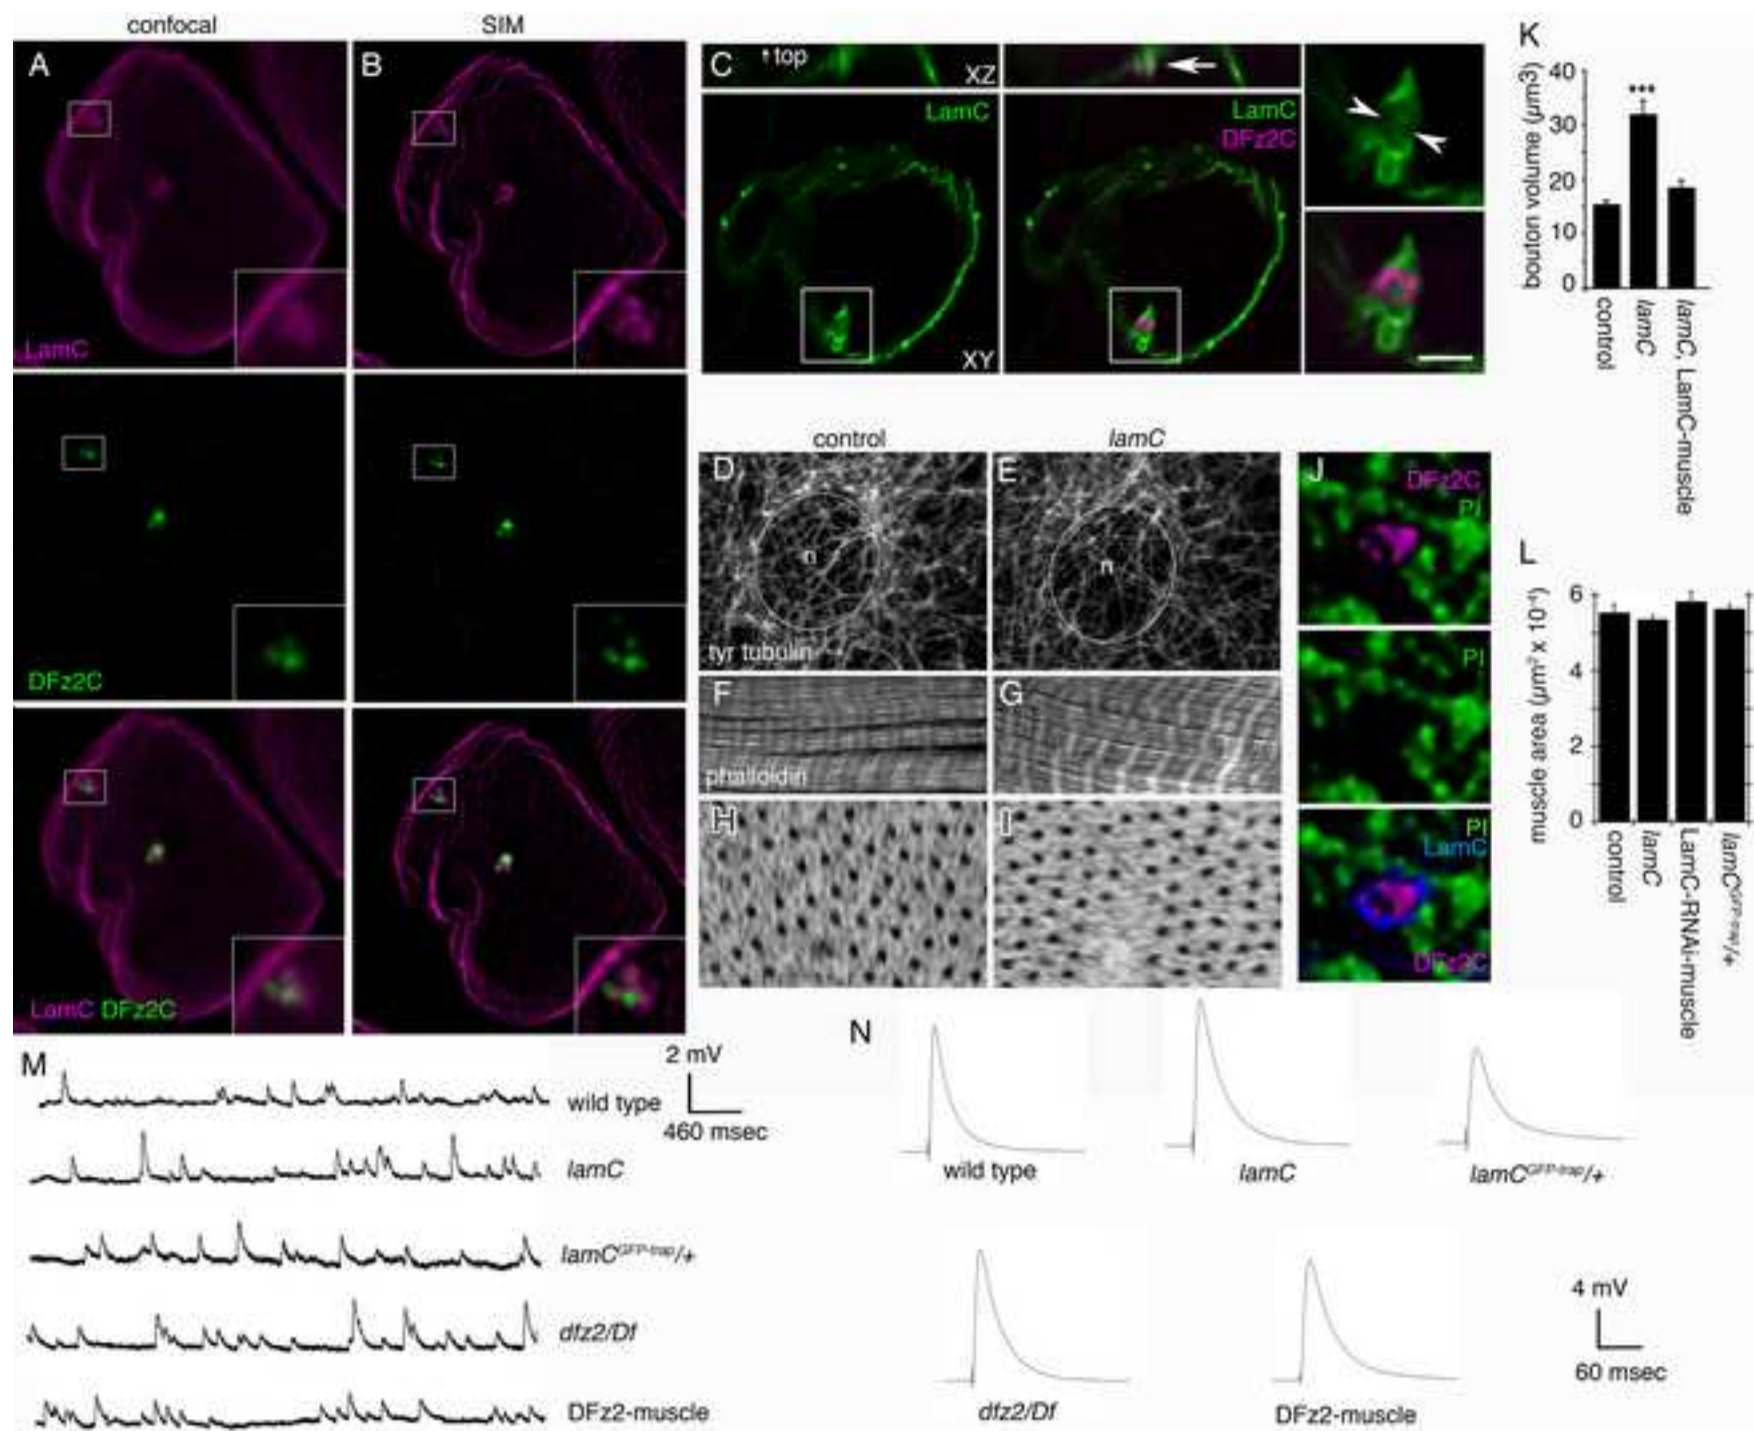

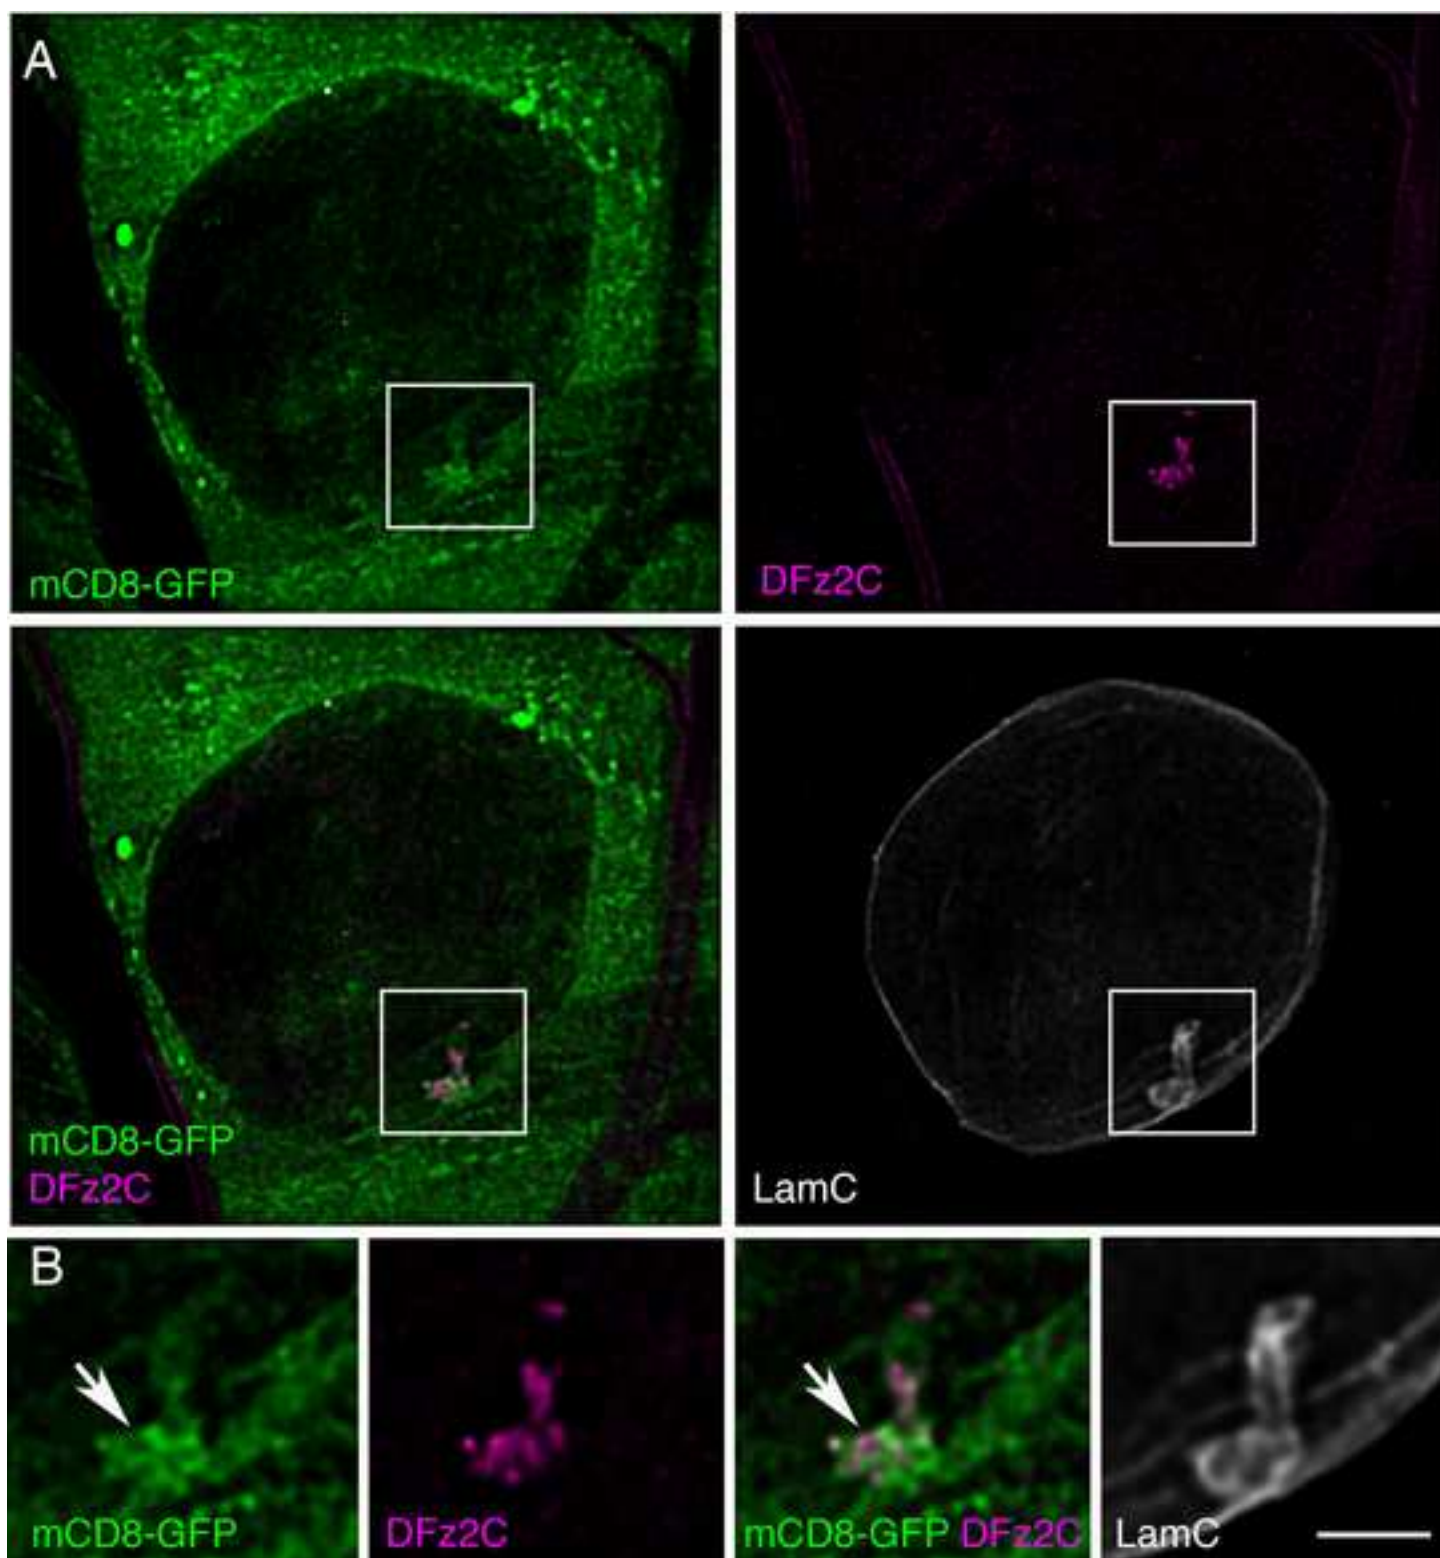



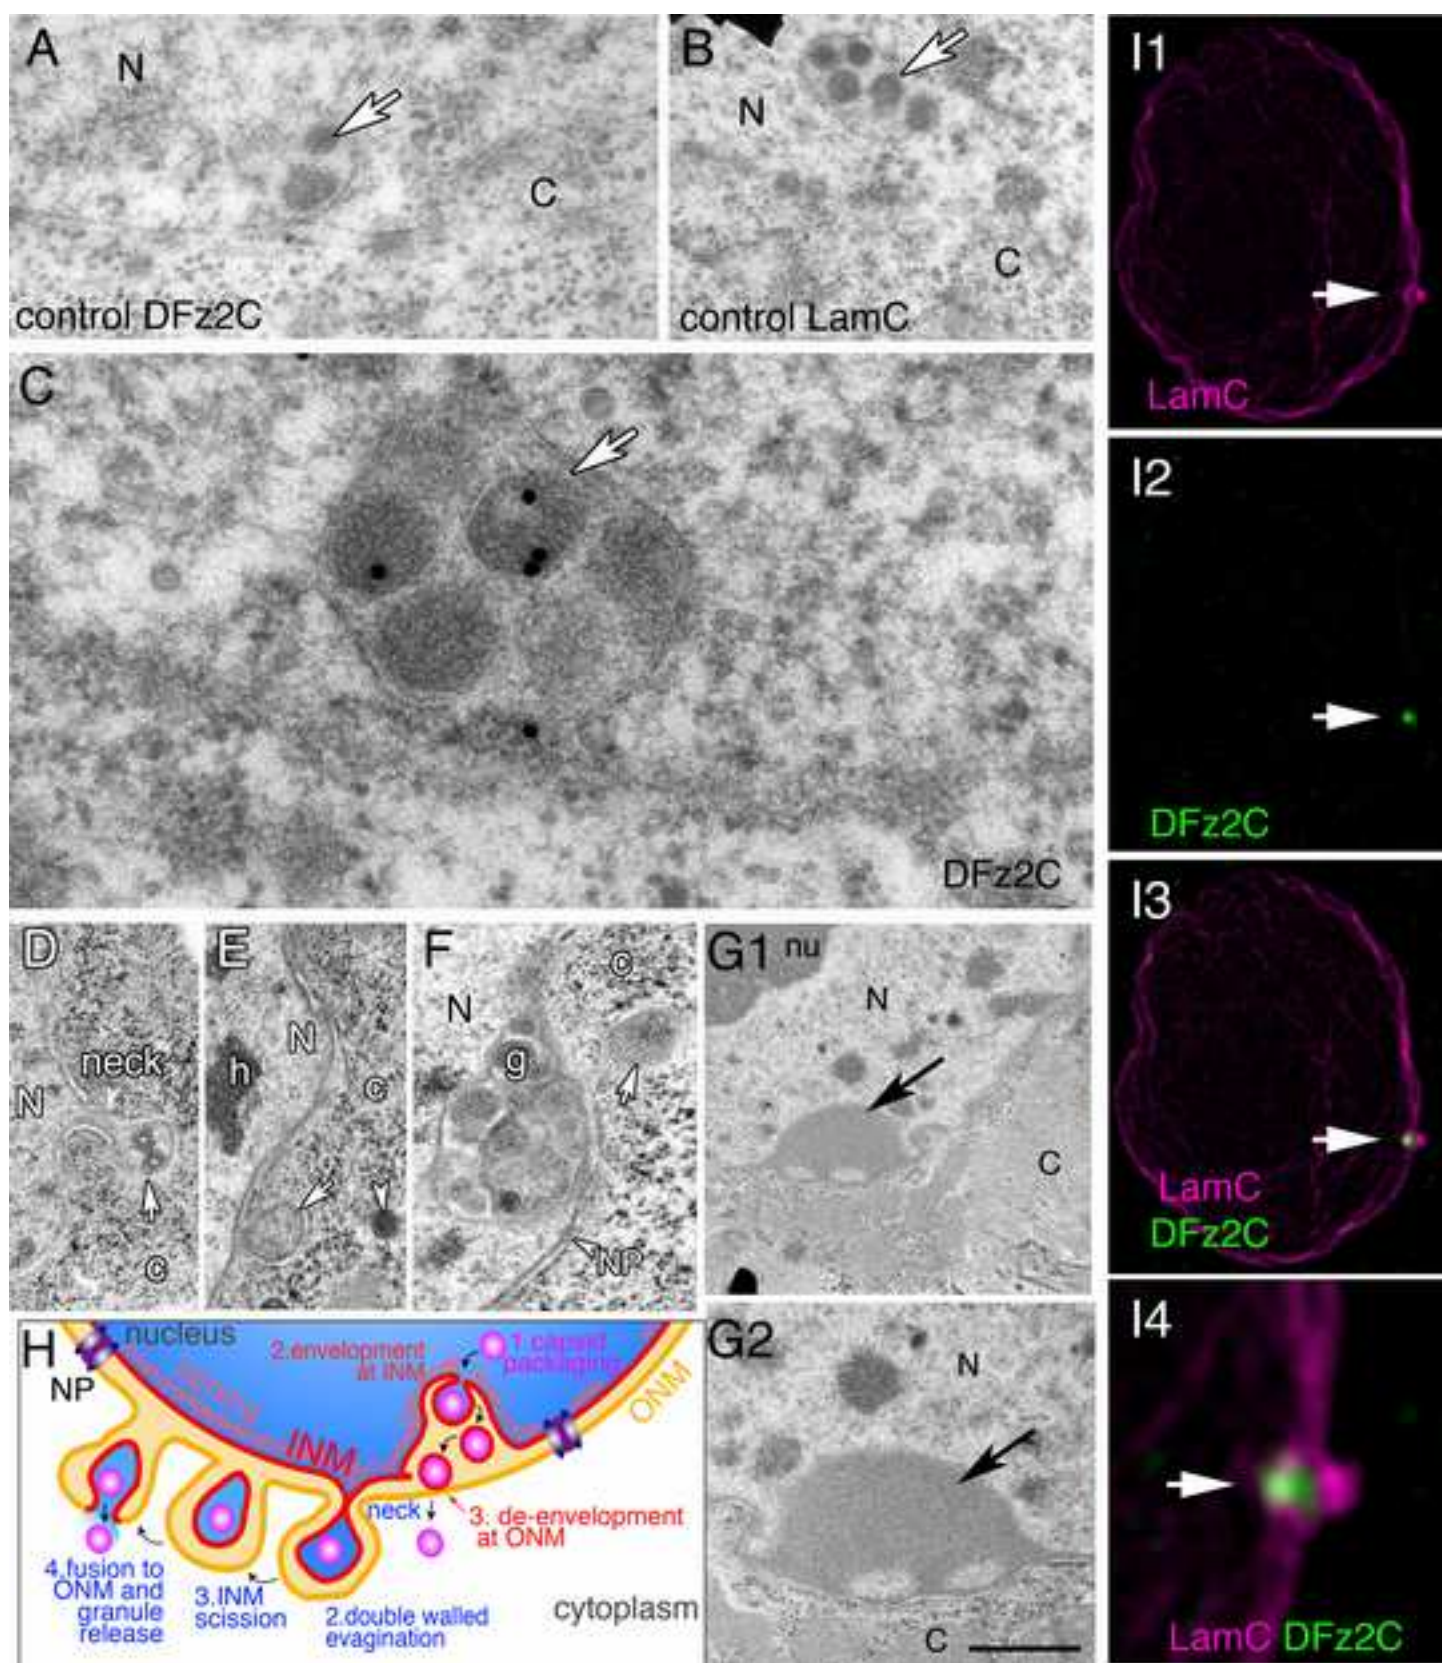

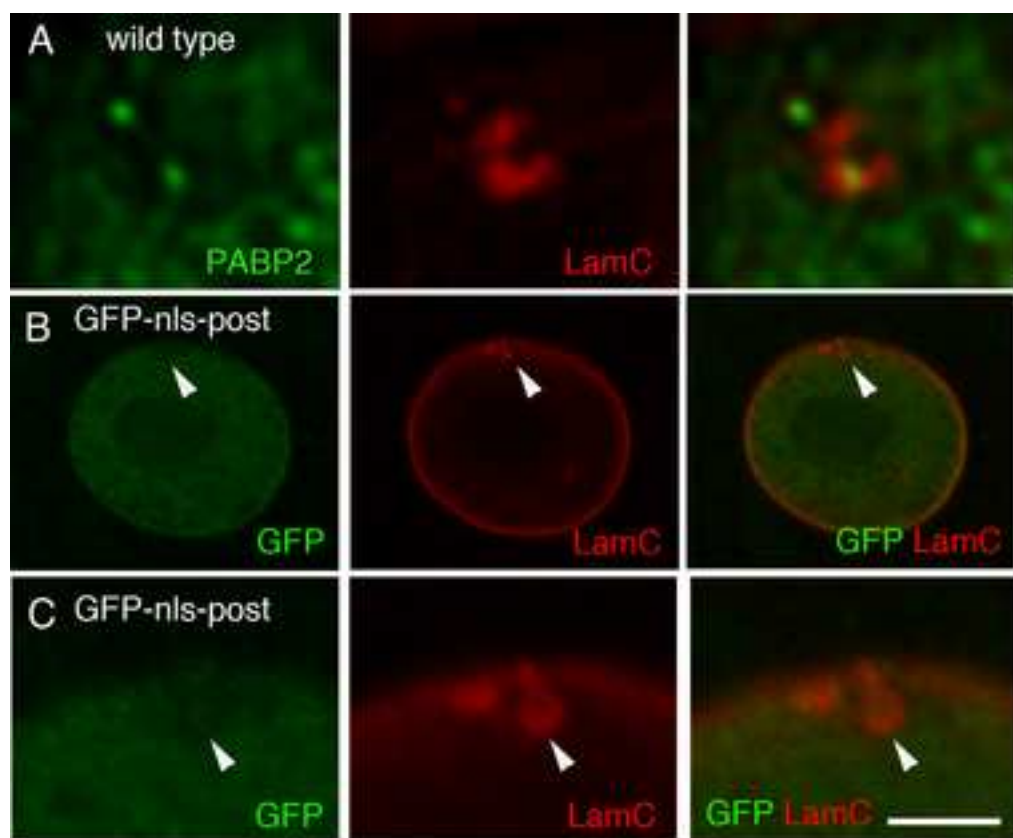

D

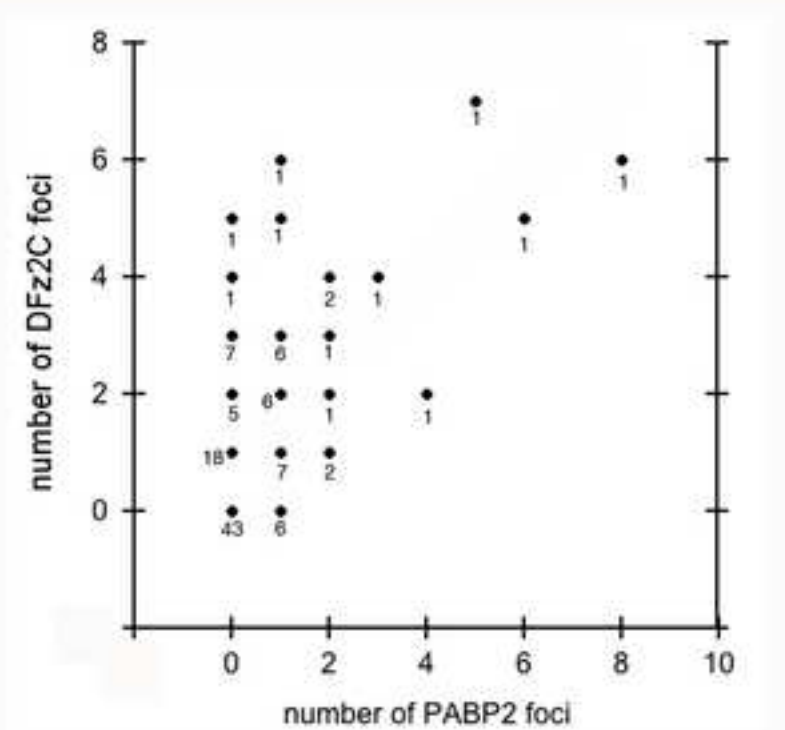

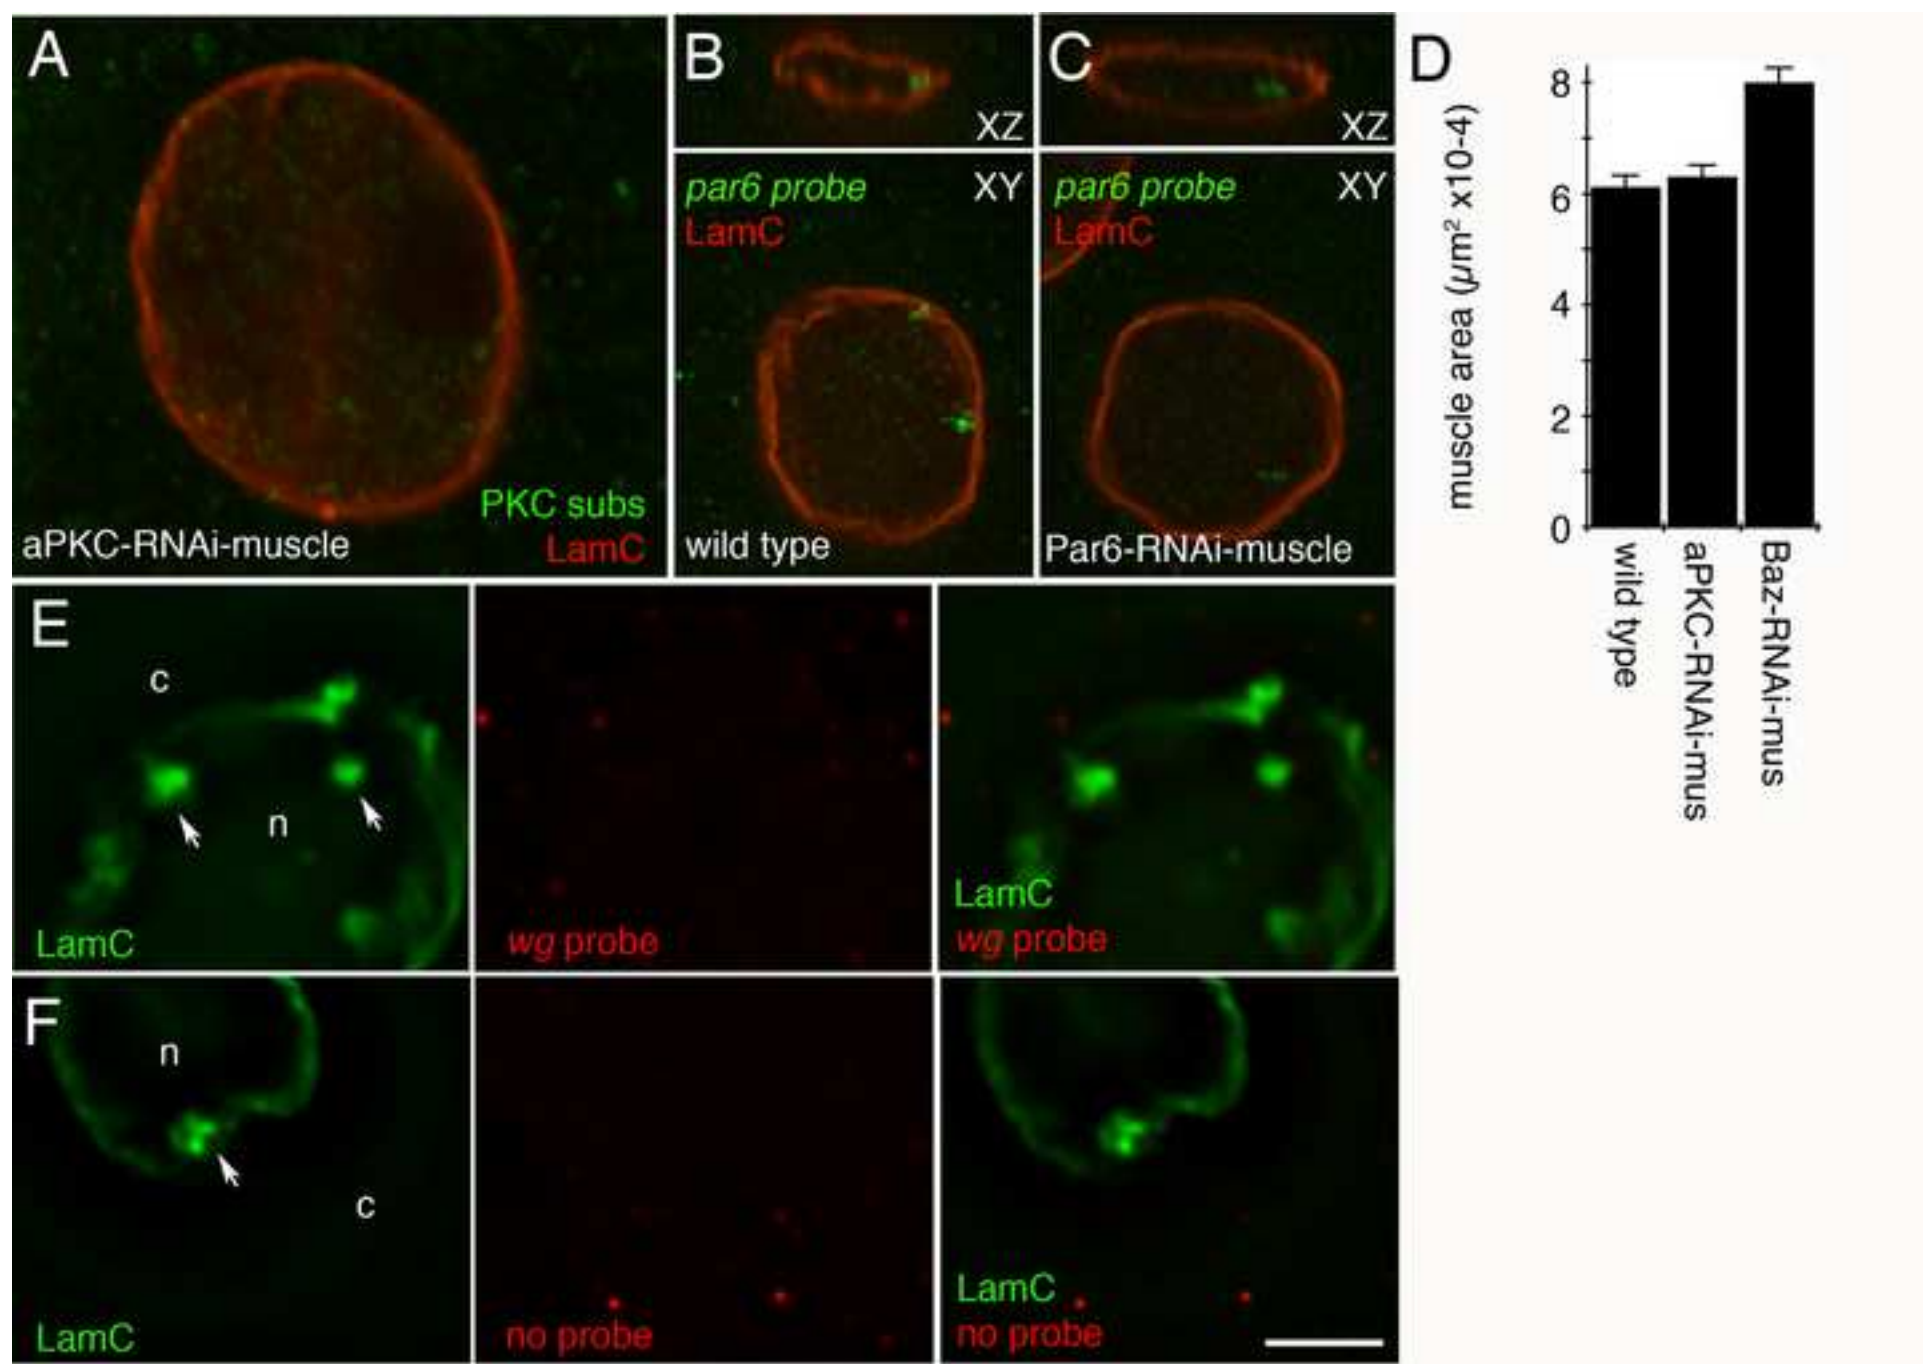



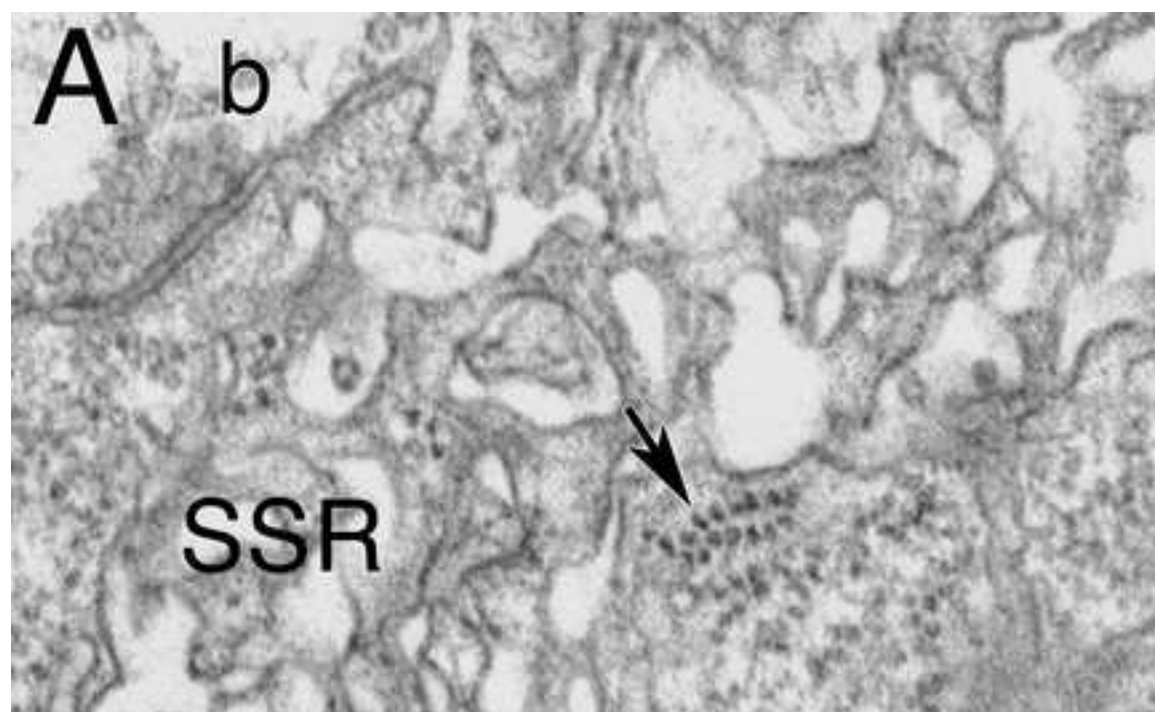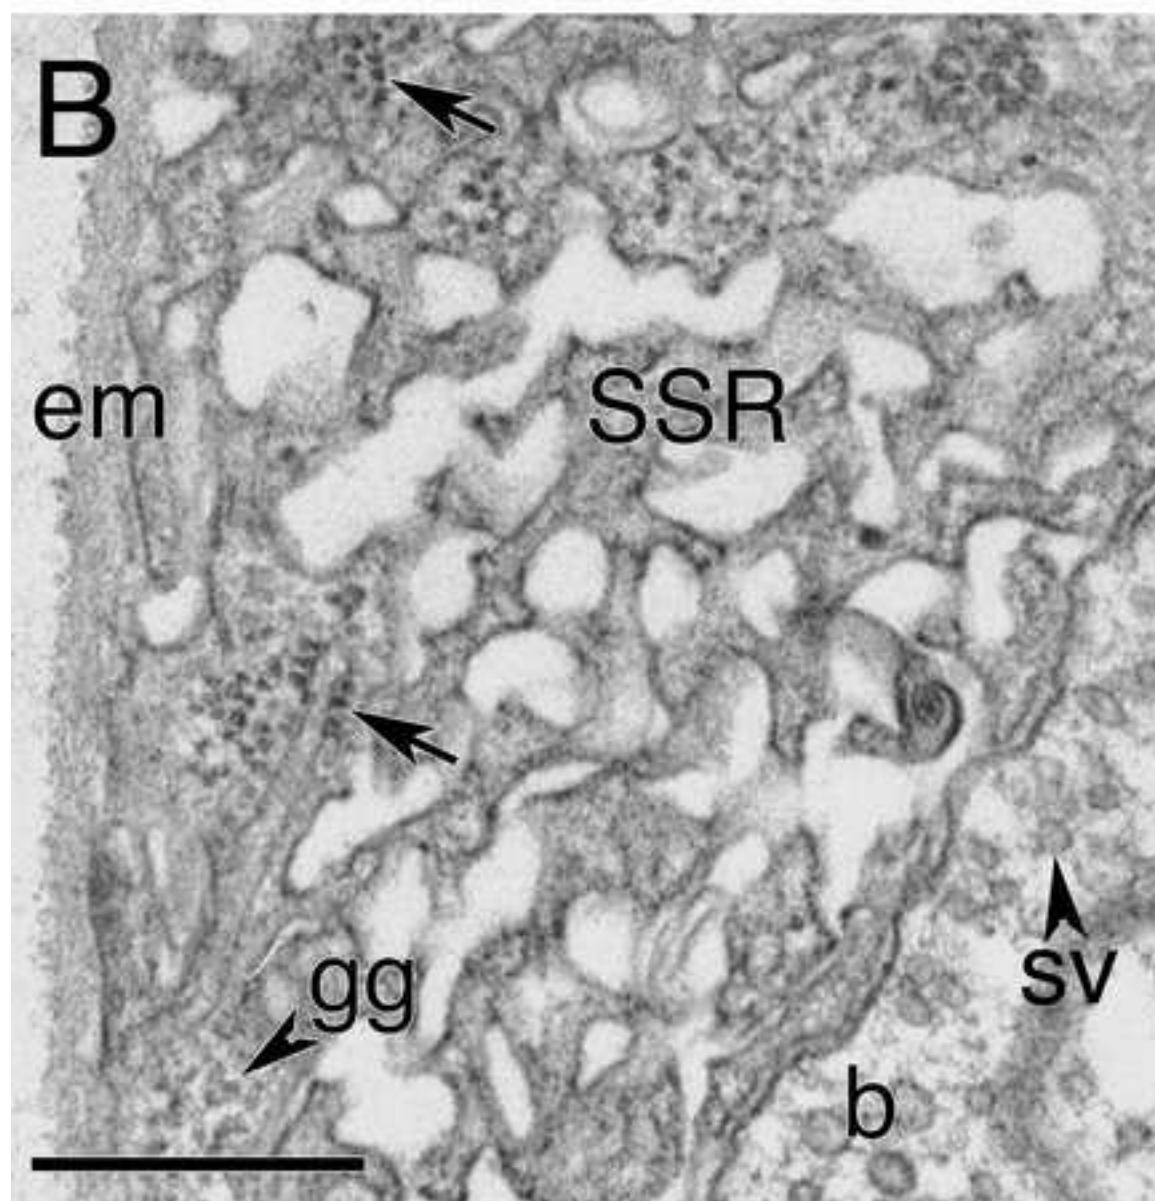

Supplement: NIHMS375935-supplement-04.pdf [file NIHMS375935-supplement-04.pdf]
